# Supplementary material
Source: PubMed Central journal article supplement (PMC6193448)
Supplement: NIHMS1505768-supplement-1.pdf [file NIHMS1505768-supplement-1.pdf]

## Supplementary Data

### A *cis*-Acting Element Downstream of the Mouse Mammary Tumor Virus Major Splice Donor Critical for RNA Elongation and Stability

Shaima Akhlaq<sup>1</sup>, Neena G. Panicker<sup>1</sup>, Pretty S. Philip<sup>2</sup>, Lizna M. Ali<sup>2</sup>, Jaquelin P. Dudley<sup>3</sup>, Tahir A. Rizvi<sup>2</sup>, and Farah Mustafa<sup>1</sup>

Departments of <sup>1</sup>Biochemistry and <sup>2</sup>Microbiology & Immunology, College of Medicine and Health Sciences, United Arab Emirates University, Al Ain, UAE, and <sup>3</sup>LaMontagne Center for Infectious Diseases, The University of Texas at Austin, TX USA

**Table S1: List of primers and their description used in this study.**

| Primer Name    | Primer Sequence<br>Forward (F)/Reverse (R)          | Target                                         | Purpose/ Reference                                                                                        |
|----------------|-----------------------------------------------------|------------------------------------------------|-----------------------------------------------------------------------------------------------------------|
| <b>OFM24</b>   | CATGTTTGTGATGGGTGTGA<br>ACCA- (F)                   | GAPDH; multiple species                        | Mustafa et al., 2000 [1].                                                                                 |
| <b>OFM25</b>   | GTTGCTGTAGCCGTATTCAT<br>TGTC- (R)                   | GAPDH; multiple species                        | Mustafa et al., 2000 [1].                                                                                 |
| <b>OFM112</b>  | CAT CAC AAG AGC GGA<br>ACG GAC- (F)                 | MMTV 5' UTR<br>upstream of SD1                 | Mertz et al., 2005 [2].<br>C3H230 (nt 1401-1419)                                                          |
| <b>OFM113</b>  | CCT CTA AAT CAT CCC AAT<br>CCT- (R)                 | MMTV Gag                                       | Mertz et al., 2005 [2].<br>Gag 620 (nt 2127-2107)                                                         |
| <b>OFM114</b>  | TCT ACC TAT TGG ATT GGT<br>CTT ATT GG- (R)          | MMTV 3' U3                                     | Mertz et al., 2005 [2].<br>LTR408 (nt 8964-8938)                                                          |
| <b>OFM115</b>  | ATC GCC TTT AAG AAG GAC<br>GCC TTC T- (F)           | MMTV Env                                       | Mertz et al., 2005 [2].<br>Env7255 (nt 7231-7256)                                                         |
| <b>OTR 580</b> | TGA GCT GCG TGT GGC<br>TCC- (F)                     | Spliced $\beta$ -actin<br>mRNA                 | $\beta$ -actin S, Tan et al., 1995 [3].<br>A 247 bp product w/OTR 581.                                    |
| <b>OTR 581</b> | GGC ATG GGG GAG GGC<br>ATA CC- (R)                  | Spliced or<br>unspliced $\beta$ -actin<br>mRNA | $\beta$ -actin A, Tan et al., 1995 [3].<br>A common reverse primer for both<br>spliced & unspliced actin. |
| <b>OTR 582</b> | CCA GTG GCT TCC CCA<br>GTG- (F)                     | Unspliced $\beta$ -actin<br>mRNA               | $\beta$ -actin S-1, Tan et al., 1995 [3].<br>A 203 bp product w/OTR 581.                                  |
| <b>OTR 671</b> | GTC CTA ATA TTC ACG TCT<br>CGT GTG- (F)             | MMTV R                                         | Nt 1179-1202 of HYB MTV.                                                                                  |
| <b>OTR 672</b> | CTG TTC GGG CGC CAG<br>CTG CCG CAG- (R)             | MMTV PBS                                       | Nt 1321-1298 of HYB MTV.                                                                                  |
| <b>OTR 930</b> | GCT TGT GTG TTG GAG<br>GTC GCT GAG- (F)             | CMV promoter                                   | Nt 90-113 of pcDNA3.<br>For sequencing.                                                                   |
| <b>OTR 552</b> | CGA CTA GTG ATA TCG TTC<br>CCC TGG TCC CAT AAG- (R) | MMTV <i>gag</i>                                | <i>Spe I</i> (nt 1885-1867 of<br>HYB-MTV <i>gag</i> )                                                     |

24 nt

|                         |            |            |            |            |            |
|-------------------------|------------|------------|------------|------------|------------|
| HYB-MTV                 | CCCGCCTACG | GAGAAGAGGT | AGGTTACGGT | GAGCCATTGG | AAATGGGGGT |
| <i>mtv-1</i> (AF228550) | .....      | .....      | .....      | .....      | .....      |
| C3H (AF228552)          | .....      | .....      | .....      | .....      | .....      |
| JYG (D16249)            | .....      | ...G.      | .....      | .....      | .....      |
| BR6 (M15122)            | .T.....A   | .....      | .....      | .....      | .....      |
| GR (V01175)             | .T.....    | .....      | .....      | .T.....    | .T.....    |

**Figure S1:** Sequence alignment of the 5' end of different MMTV strains. The shaded boxed region highlights the 24-nt region analyzed. Presence of a dot shows sequence identity, whereas differences are shown as capital letters.

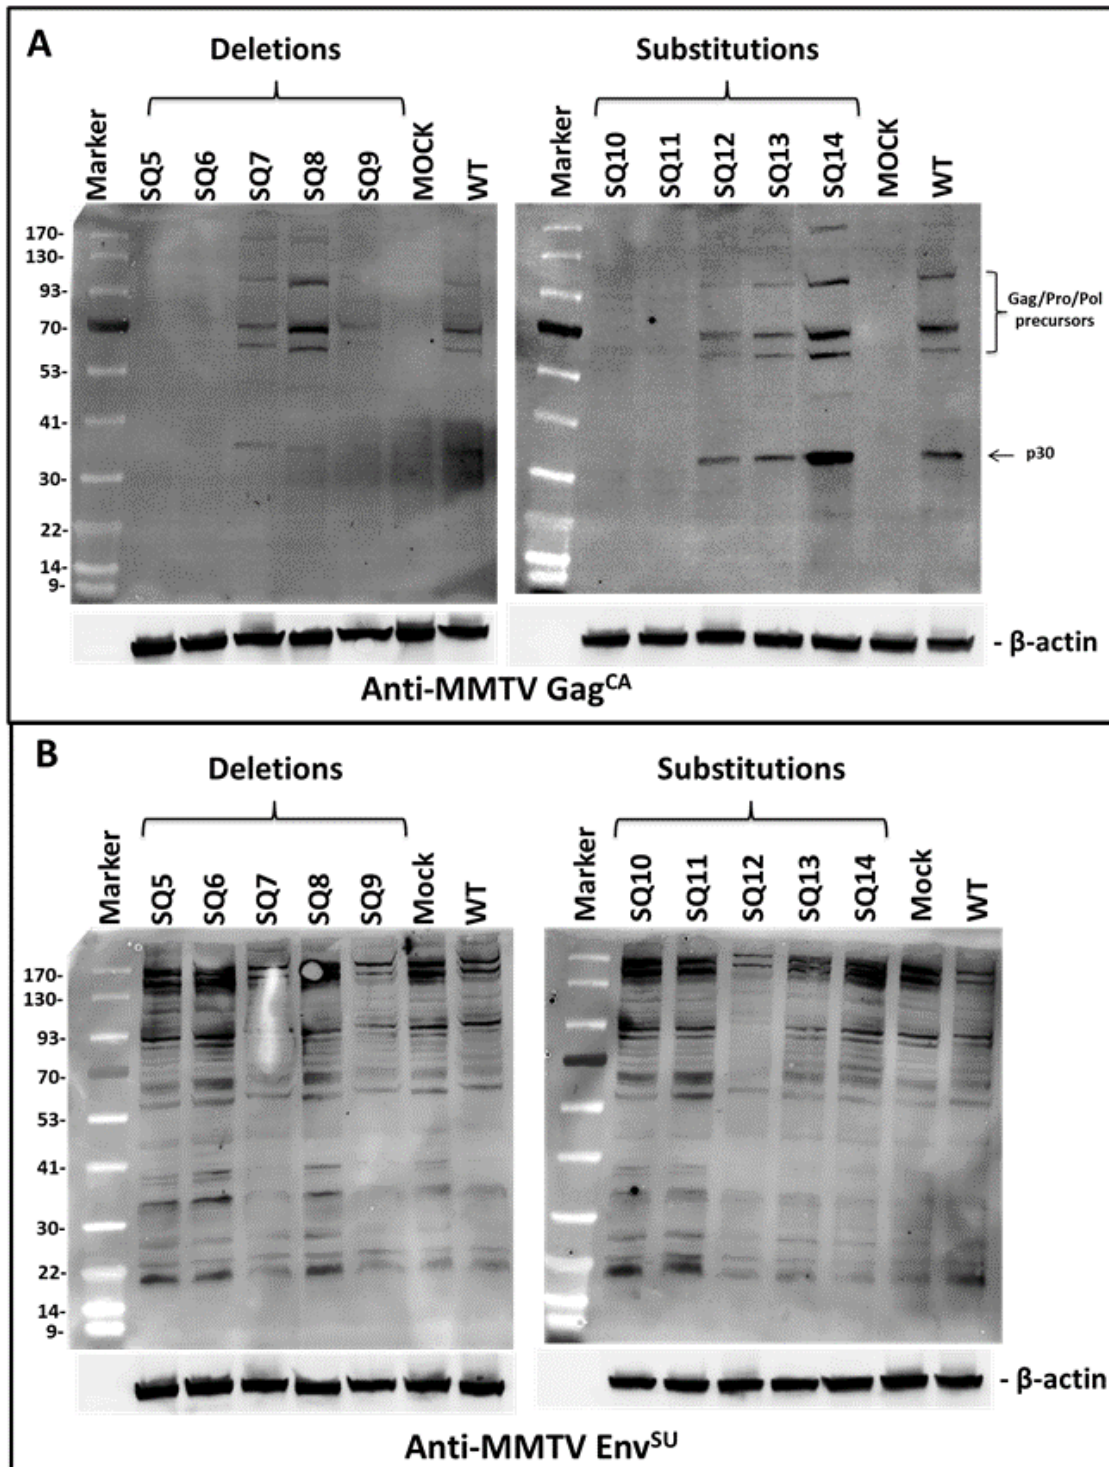

**Figure S2. The 5' UTR mutants show a similar defect in cells of mouse origin for Gag/Pol protein expression.** Western blot analysis of normal mouse mammary epithelial HC11 cells transfected with the wild type (WT) and mutant clones. **(A)**  $\alpha$ -MMTV Gag<sup>CA</sup> antibody and **(B)**  $\alpha$ -MMTV Env<sup>SU</sup> antibody along with human  $\beta$ -actin serving as a loading control in both gels. Mock, HC11 cells transfected with pcDNA3 plasmid alone.

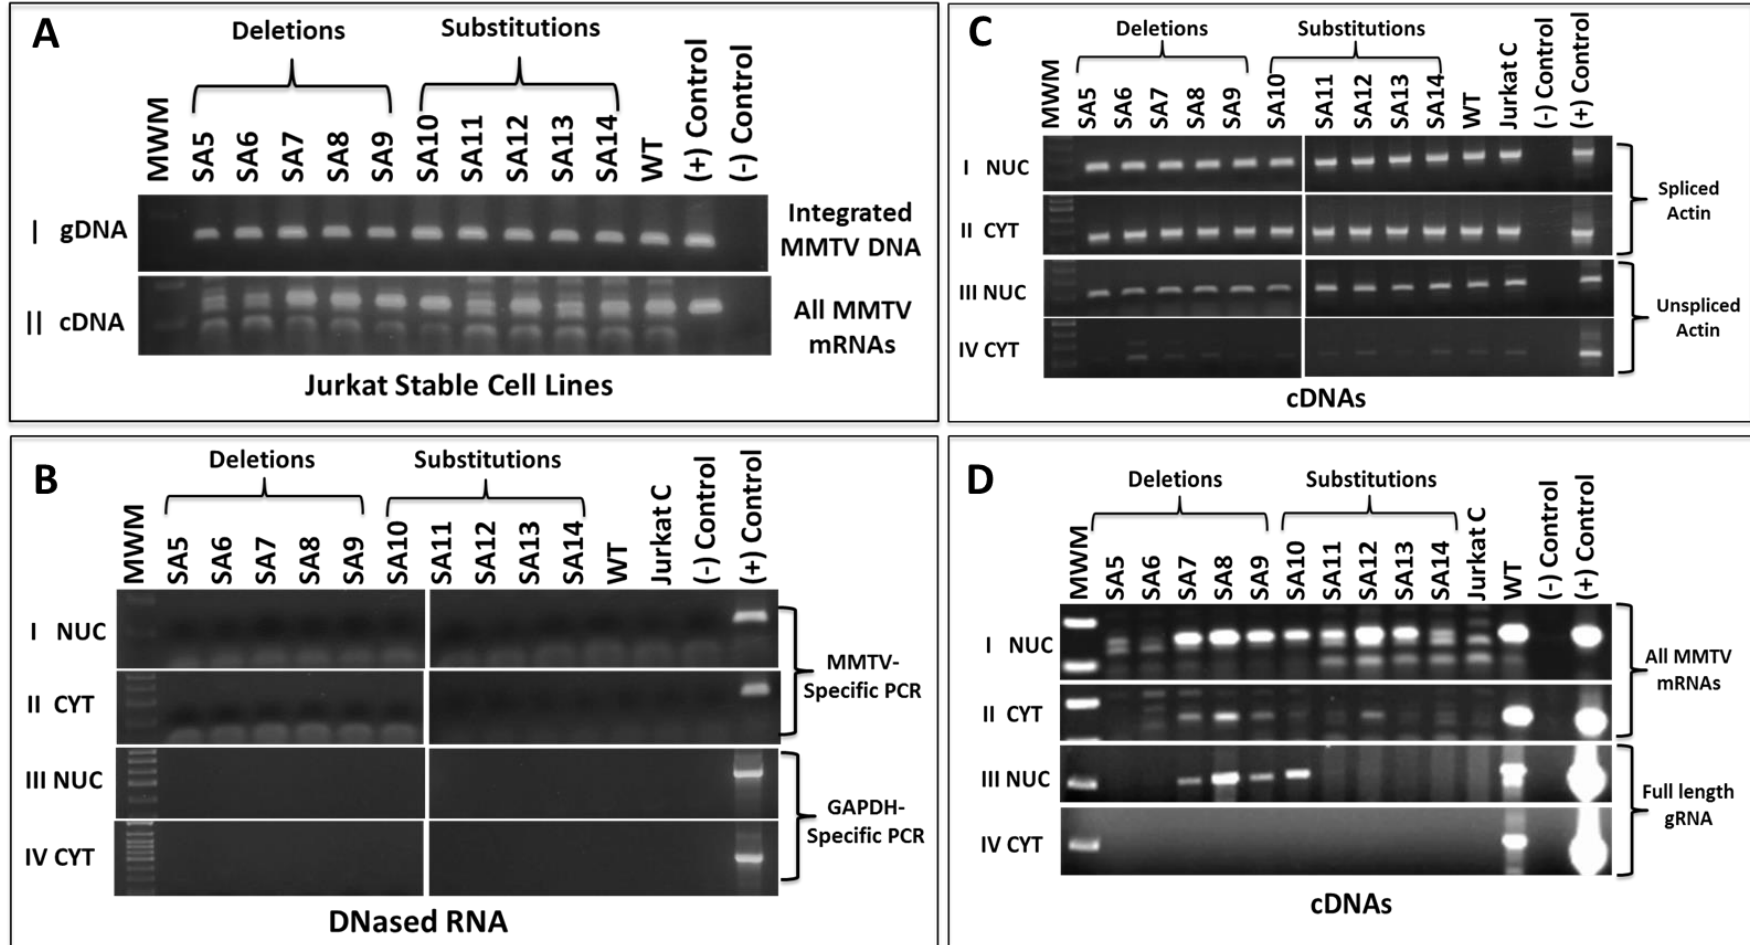

**Figure S3. Characterization of Jurkat stable cell lines expressing the wild type and mutant proviruses containing the MMTV 5' LTR.** (A) Analysis of DNA and RNA extracted from wild-type (WT) and mutant constructs stably transfected into Jurkat cells using PCR with primers OTR671/OTR672. Panel I: PCR amplification of MMTV-specific sequences from gDNA; Panel II: RT-PCR analysis of all MMTV-specific mRNAs from total RNA. (B) PCR analysis of NUC and CYT RNAs following DNase-treatment with MMTV-specific primers OTR671/OTR672 in panels I & II and GAPDH primers in panels III & IV. (C) RT-PCR analysis of NUC and CYT samples for spliced (panels I & II) and unspliced  $\beta$ -actin mRNAs (panels III & IV). (D) RT-PCR analysis of NUC and CYT samples for all MMTV mRNAs (OTR671/OTR672) in panels I & II, and full-length gRNAs (OFM112/OFM113) in panels III & IV. The gel images in this figure were spliced together from several independent gels due to the large number of samples.

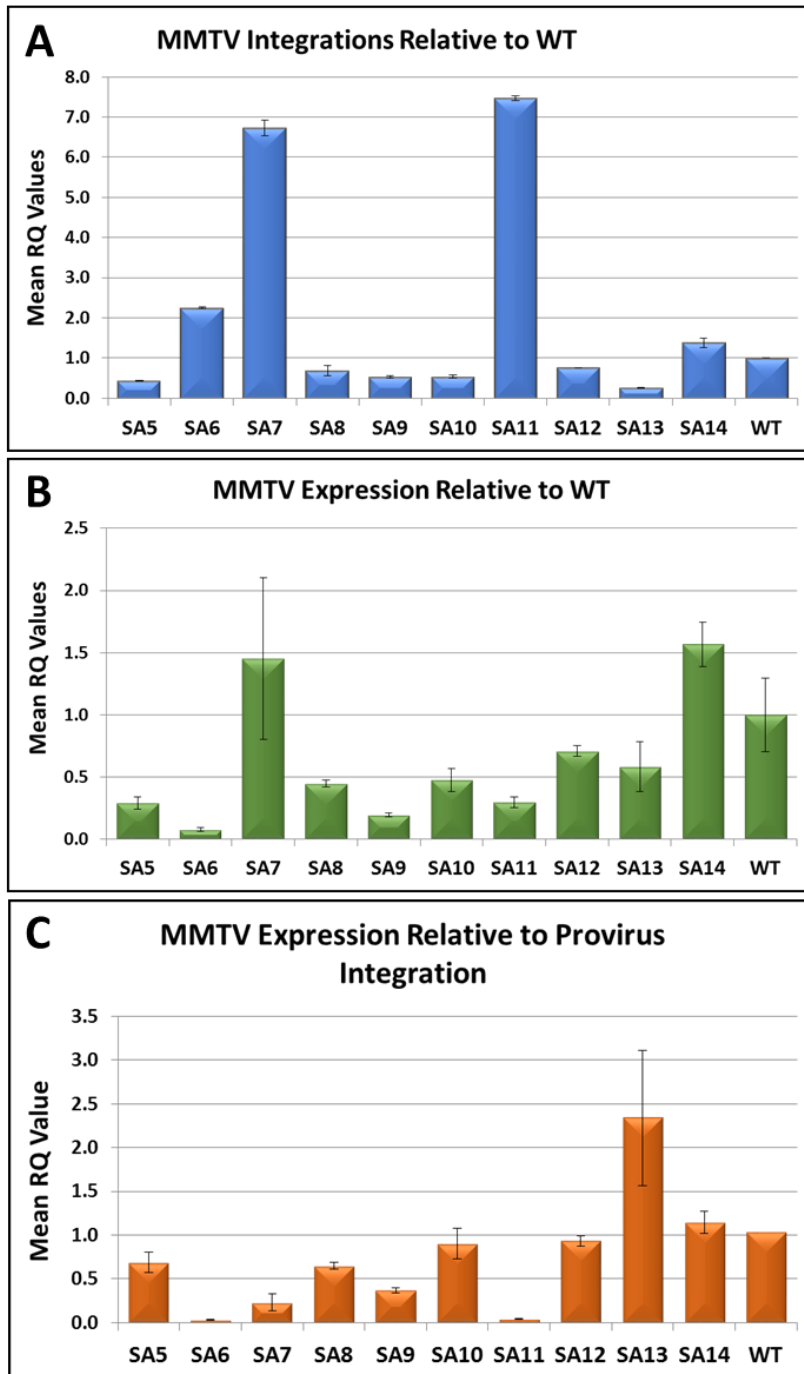

**Figure S4: Quantitative PCR analysis of virus expression in Jurkat stable cell lines.** Real time PCR was conducted on (A) 50 ng gDNA, and (B) cDNAs from the same Jurkat (JC) stable cell lines expressing the wild type (WT) and mutant (SA5-SA14) MMTV clones. The previously-published custom-made Taqman Assay 1 (detects HYB-MTV 5' U5 region) was used to quantitate MMTV gDNA and all MMTV transcripts from the LTR promoter in these samples [34, 35] (C) Normalization of the MMTV RNA expression relative to the integration level in the Jurkat stable cell lines.

## References:

- [1] Mustafa F, Lozano M, Dudley JP. C3H mouse mammary tumor virus superantigen function requires a splice donor site in the envelope gene. *J Virol.* 2000;74:9431-40.
- [2] Mertz JA, Simper MS, Lozano MM, Payne SM, Dudley JP. Mouse mammary tumor virus encodes a self-regulatory RNA export protein and is a complex retrovirus. *J Virol.* 2005;79:14737-47.
- [3] Tan W, Felber BK, Zolotukhin AS, Pavlakis GN, Schwartz S. Efficient expression of the human papillomavirus type 16 L1 protein in epithelial cells by using Rev and the Rev-responsive element of human immunodeficiency virus or the cis-acting transactivation element of simian retrovirus type 1. *J Virol.* 1995;69:5607-20.
